# Supplementary material
Source: Elsevier journal article supplement (https://www.sciencedirect.com/science/article/pii/S0210480621000061)
Supplement: mmc1 [file S0210480621000061:mmc1.pdf]

SUPPLEMENTARY MATERIAL  
Figure S1.

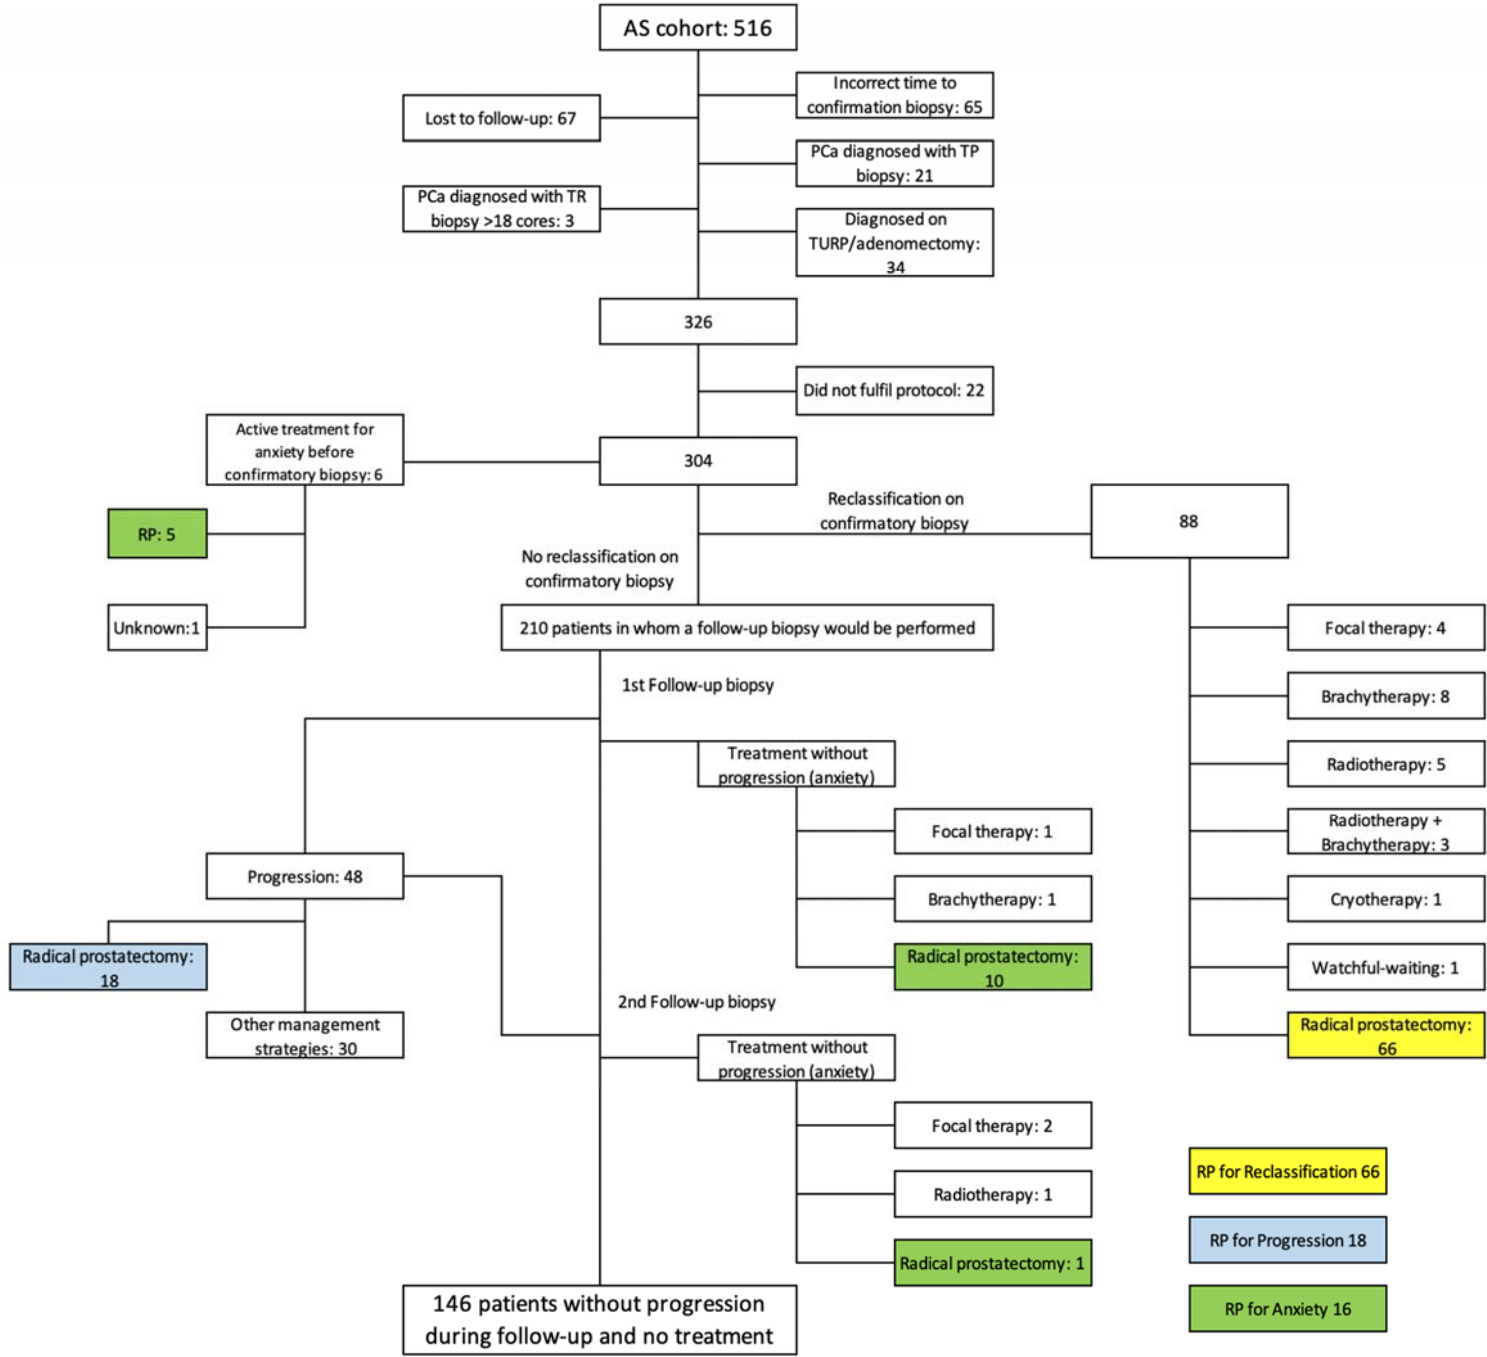

**Table S1.** Clinical and pathological characteristics of all patients under AS at our centre

| Variable                                             | Total            | Induced AS       | Per-protocol AS  | P-value          |
|------------------------------------------------------|------------------|------------------|------------------|------------------|
|                                                      | 516 (100%)       | 162 (31 %)       | 354 (69%)        |                  |
| <b>PSA at diagnosis (ng/ml), Median (IQR)</b>        | 5.3 (4-7.4)      | 6.2 (4.5-10.9)   | 5 (3.8-7)        | <b>&lt;0.001</b> |
| <b>Age at diagnosis (years), Median (IQR)</b>        | 65.8 (60.1-70.7) | 68.6 (64-73)     | 64.2 (59.3-69.3) | <b>&lt;0.001</b> |
| <b>Prostatic vol at diagnosis (ml), Median (IQR)</b> | 40 (31-55.7)     | 40 (30.5-50)     | 40 (31.9-57.7)   | 0.079            |
| <b>PSA density, Median (IQR)</b>                     | 0.13 (0.09-0.19) | 0.17 (0.12-0.27) | 0.12 (0.09-0.17) | <b>&lt;0.001</b> |
| <b>BMI at diagnosis, Median (IQR)</b>                | 26.4 (24.1-29)   | 26.1 (23.2-29)   | 26.5 (24.3-28.9) | 0.499            |
| <b>ASA risk at diagnosis, n (%)</b>                  |                  |                  |                  | 0.053            |
| 3                                                    | 45 (16)          | 20 (24)          | 25 (13)          |                  |
| <b>Charlson index at diagnosis, Median (IQR)</b>     | 1.7 (0-2.8)      | 1.9 (0-3)        | 1.6 (0-2.7)      | 0.359            |
| <b>GS at diagnosis, n (%)</b>                        |                  |                  |                  | <b>&lt;0.001</b> |
| 3+3                                                  | 482 (94)         | 135 (83)         | 347 (98)         |                  |
| 3+4                                                  | 27 (5)           | 20 (13)          | 7 (2)            |                  |
| 4+3                                                  | 7 (1)            | 7 (4)            | 0 (0)            |                  |

Note: bold values indicate statistical significance ( $p < 0.05$ )

Abbreviations: AS, Active surveillance; PSA, Prostate specific antigen; IQR, Interquartile range; BMI, Body mass index.

**Table S2.** Secondary treatment strategy performed during follow up for the whole AS population stratified by indication.

|                                                                        | Focal therapy | Brachytherapy | Radiotherapy | Radiotherapy/<br>Brachytherapy | Cryotherapy | ADT      | AS or<br>watchful-<br>waiting | Radical<br>prostatectomy | Total     | P-value          |
|------------------------------------------------------------------------|---------------|---------------|--------------|--------------------------------|-------------|----------|-------------------------------|--------------------------|-----------|------------------|
| Reclassification, n (%)                                                | 4 (5)         | 8 (9)         | 5 (6)        | 3 (3)                          | 1 (1)       | 0 (0)    | 1 (1)                         | 66 (75)                  | 88 (29)   | <b>&lt;0.001</b> |
| Progression, n (%)                                                     | 1 (2)         | 6 (13)        | 4 (8)        | 2 (4)                          | 1 (2)       | 1 (2)    | 15 (31)                       | 18 (38)                  | 48 (16)   |                  |
| Not progression during<br>follow-up and not<br>treated, n (%)          | 0 (0)         | 0 (0)         | 0 (0)        | 0 (0)                          | 0 (0)       | 0 (0)    | 146 (100)                     | 0 (0)                    | 146 (48)  |                  |
| Treated without<br>progression after 1st<br>follow-up biopsy, n<br>(%) | 1 (8)         | 1 (8)         | 0 (0)        | 0 (0)                          | 0 (0)       | 0 (0)    | 0 (0)                         | 10 (84)                  | 12 (4)    |                  |
| Treated without<br>progression after 2nd<br>follow-up biopsy, n<br>(%) | 2 (50)        | 0 (0)         | 1 (25)       | 0 (0)                          | 0 (0)       | 0 (0)    | 0 (0)                         | 1 (25)                   | 4 (1)     |                  |
| Anxiety prior to first<br>biopsy, n (%)                                | 0 (0)         | 1 (17)        | 0 (0)        | 0 (0)                          | 0 (0)       | 0 (0)    | 0 (0)                         | 5 (83)                   | 6 (2)     |                  |
| Total                                                                  | 8 (3)         | 16 (5)        | 10 (3)       | 5 (2)                          | 2 (1)       | 1 (0.33) | 162 (53)                      | 100 (33)                 | 304 (100) |                  |

Note: bold values indicate statistical significance (p&lt; 0.05)

Abbreviations: ADT, Androgen deprivation therapy; AS, Active surveillance.

**Table S3.** Additional clinical and pathological characteristics of patients who underwent RP post AS

| Variable                                             | Total                        | Induced AS                | Per-protocol AS          | P-value | Reclassification            | Progression                | Anxiety                    | P-value |
|------------------------------------------------------|------------------------------|---------------------------|--------------------------|---------|-----------------------------|----------------------------|----------------------------|---------|
| <i>Prostatic vol at diagnosis (ml), Median (IQR)</i> | 100 (100%)<br>37.1 (26.9-45) | 31 (31 %)<br>35 (26-44.5) | 69 (69%)<br>37.3 (27-45) | 0.923   | 66 (66 %)<br>35.3 (25-43.9) | 18 (18%)<br>42.1 (36.3-49) | 16 (16%)<br>33.6 (28-42.1) | 0.144   |
| <i>BMI at diagnosis, Median (IQR)</i>                | 27 (25-29)                   | 27 (25-29.4)              | 27 (25-28.6)             | 0.582   | 27 (24.9-29.4)              | 26.6 (25.3-28.2)           | 27.4 (25.9-28.5)           | 0.621   |
| <i>ASA risk, n (%)</i>                               | 3      6 (8)                 | 2 (8)                     | 4 (8)                    | 0.628   | 5 (10)                      | 1 (9)                      | 0 (0)                      | 0.832   |
| <i>Perineural invasion, n (%)</i>                    | 52 (53)                      | 17 (57)                   | 35 (51)                  | 0.798   | 37 (56)                     | 10 (62)                    | 5 (31)                     | 0.145   |
| <i>Lymphatic invasion, n (%)</i>                     | 5 (6)                        | 2 (9)                     | 3 (5)                    | 0.887   | 3 (6)                       | 2 (12)                     | 0 (0)                      | 0.469   |

Abbreviations: AS, Active surveillance; Prostatic vol, Prostatic volume; IQR, Interquartile range; BMI, Body mass index; ASA: American Society of Anaesthesiologists.
